# Supplementary material
Source: publisher site journal article supplement (https://www.dovepress.com/article/432695)
Supplement: Supplementary file 1 [file get_supplementary_file.php]

## Supplementary Materials

### Supplementary Figure 1 Changes in maintenance oral corticosteroid dose

Abbreviation: SD, standard deviation

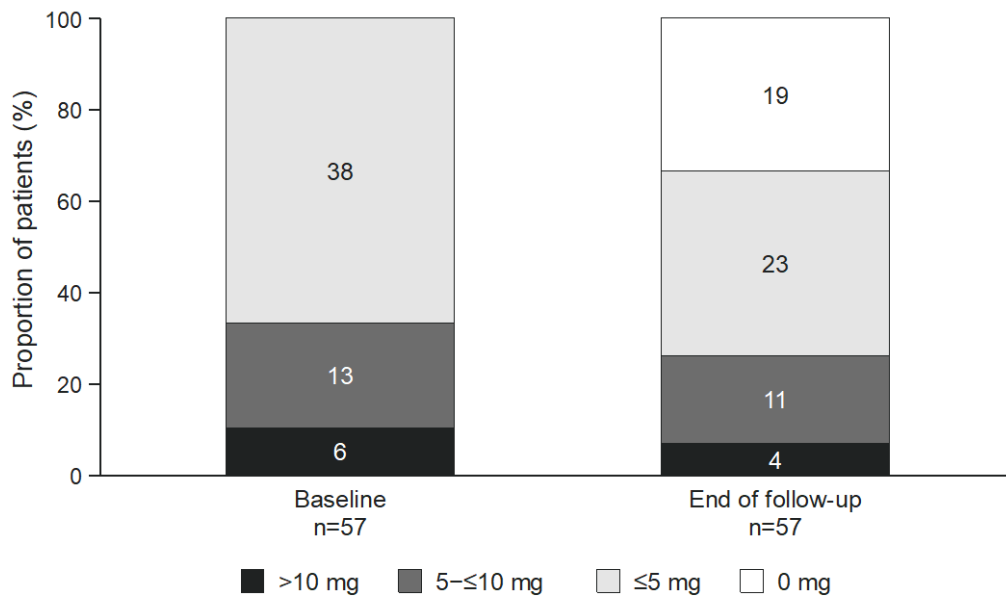

|           | Baseline<br>(n=57) | End of follow-up<br>(n=57) |
|-----------|--------------------|----------------------------|
| Mean (SD) | 6.7 (4.2)          | 4.4 (4.6)                  |
| Min, Max  | 1.0, 20.0          | 0.0, 20.0                  |
| Median    | 5.0                | 4.2                        |

**Supplementary Table 1.** Status of onset of adverse drug reactions/infections

|                                                           | <b>Safety population (n=632)</b> |
|-----------------------------------------------------------|----------------------------------|
| Patients with adverse drug reactions <sup>a</sup> , n (%) | 80 (12.7)                        |
| <b>SOC/PT</b>                                             | <b>n (%)</b>                     |
| Infectious and parasitic diseases                         | 9 (1.4)                          |
| Pneumonia                                                 | 5 (0.8)                          |
| Gastroenteritis                                           | 1 (0.2)                          |
| Otitis media                                              | 1 (0.2)                          |
| Pharyngitis                                               | 1 (0.2)                          |
| Oral herpes                                               | 1 (0.2)                          |
| Allergic bronchopulmonary mycosis                         | 1 (0.2)                          |
| Immune system disorder                                    | 2 (0.3)                          |
| Anaphylactic reaction                                     | 1 (0.2)                          |
| Atopy                                                     | 1 (0.2)                          |
| Metabolism and nutrition disorders                        | 1 (0.2)                          |
| Decreased appetite                                        | 1 (0.2)                          |
| Nervous system disorder                                   | 21 (3.3)                         |
| Headache                                                  | 17 (2.7)                         |
| Guillain-Barre syndrome                                   | 1 (0.2)                          |
| Hypoesthesia                                              | 1 (0.2)                          |
| 6th nerve paralysis                                       | 1 (0.2)                          |
| Taste disorder                                            | 1 (0.2)                          |
| Ear and labyrinth disorders                               | 3 (0.5)                          |
| Eosinophilic otitis media                                 | 2 (0.3)                          |
| Ear discomfort                                            | 1 (0.2)                          |
| Cardiac disorders                                         | 1 (0.2)                          |
| Arrhythmia                                                | 1 (0.2)                          |
| Vascular disorders                                        | 1 (0.2)                          |
| Hot flash                                                 | 1 (0.2)                          |
| Respiratory, thoracic and mediastinal disorders           | 19 (3.0)                         |
| Asthma                                                    | 10 (1.6)                         |
| Epistaxis                                                 | 2 (0.3)                          |
| Upper respiratory tract inflammation                      | 2 (0.3)                          |
| Alveolar proteinosis                                      | 1 (0.2)                          |
| Cough                                                     | 1 (0.2)                          |
| Dyspnea                                                   | 1 (0.2)                          |
| Hemoptysis                                                | 1 (0.2)                          |
| Lung infiltration                                         | 1 (0.2)                          |
| Rhinorrhea                                                | 1 (0.2)                          |
| Oropharyngeal pain                                        | 1 (0.2)                          |
| Chronic eosinophilic rhinosinusitis                       | 1 (0.2)                          |
| Respiratory symptom                                       | 1 (0.2)                          |

|                                                      |          |
|------------------------------------------------------|----------|
| Gastrointestinal disorders                           | 6 (0.9)  |
| Vomiting                                             | 2 (0.3)  |
| Abdominal pain                                       | 1 (0.2)  |
| Abdominal pain upper                                 | 1 (0.2)  |
| Diarrhea                                             | 1 (0.2)  |
| Oral discomfort                                      | 1 (0.2)  |
| Stomatitis                                           | 1 (0.2)  |
| Skin and subcutaneous tissue disorders               | 10 (1.6) |
| Rash                                                 | 4 (0.6)  |
| Angioedema                                           | 1 (0.2)  |
| Dermatitis atopic                                    | 1 (0.2)  |
| Drug eruption                                        | 1 (0.2)  |
| Erythema annulare                                    | 1 (0.2)  |
| Pruritus                                             | 1 (0.2)  |
| Rash pruritic                                        | 1 (0.2)  |
| Urticaria                                            | 1 (0.2)  |
| Musculoskeletal and connective tissue disorders      | 3 (0.5)  |
| Musculoskeletal stiffness                            | 2 (0.3)  |
| Muscular weakness                                    | 1 (0.2)  |
| General disorders and administration site conditions | 24 (3.8) |
| Pyrexia                                              | 15 (2.4) |
| Malaise                                              | 5 (0.8)  |
| Edema                                                | 2 (0.3)  |
| Chest pain                                           | 1 (0.2)  |
| Death                                                | 1 (0.2)  |
| Edema peripheral                                     | 1 (0.2)  |
| Injection site discomfort                            | 1 (0.2)  |
| Investigations                                       | 5 (0.8)  |
| Eosinophil count increased                           | 3 (0.5)  |
| C-reactive protein increased                         | 1 (0.2)  |
| Weight increased                                     | 1 (0.2)  |
| Injury, poisoning and procedural complications       | 1 (0.2)  |
| Infusion related reaction                            | 1 (0.2)  |

---

MedDRA/J version 25.1.

<sup>a</sup> Defined as any adverse event causally related to benralizumab or for which a causal relationship with benralizumab was unknown due to insufficient or contradictory information.

**Abbreviations:** PT, preferred term; SOC, system organ class.

**Supplementary Table 2.** Summary of serious adverse events by system organ class and preferred term

|                                                                     | <b>Safety population (n=632)</b> |
|---------------------------------------------------------------------|----------------------------------|
| Patients with serious adverse events <sup>a</sup> , n (%)           | 82 (13.0)                        |
| <b>SOC/PT</b>                                                       | <b>n (%)</b>                     |
| Infectious and parasitic diseases                                   | 24 (3.8)                         |
| Pneumonia                                                           | 9 (1.4)                          |
| Bronchitis                                                          | 4 (0.6)                          |
| Pneumonia aspiration                                                | 4 (0.6)                          |
| Gastroenteritis                                                     | 2 (0.3)                          |
| Pneumonia bacterial                                                 | 2 (0.3)                          |
| Influenza                                                           | 1 (0.2)                          |
| Nasopharyngitis                                                     | 1 (0.2)                          |
| Pneumonia pneumococcal                                              | 1 (0.2)                          |
| Sepsis                                                              | 1 (0.2)                          |
| Psoas abscess                                                       | 1 (0.2)                          |
| Respiratory tract infection                                         | 1 (0.2)                          |
| Post procedural infection                                           | 1 (0.2)                          |
| Neoplasms benign, malignant and unspecified (incl cysts and polyps) | 1 (0.2)                          |
| Metastases to liver <sup>b</sup>                                    | 1 (0.2)                          |
| Rectosigmoid cancer stage IV <sup>b</sup>                           | 1 (0.2)                          |
| Blood and lymphatic system disorders                                | 1 (0.2)                          |
| Anemia                                                              | 1 (0.2)                          |
| Immune system disorder                                              | 3 (0.5)                          |
| Anaphylactic reaction                                               | 2 (0.3)                          |
| Eosinophilic granulomatosis with polyangiitis                       | 1 (0.2)                          |
| Metabolism and nutrition disorders                                  | 3 (0.5)                          |
| Decreased appetite                                                  | 2 (0.3)                          |
| Marasmus                                                            | 1 (0.2)                          |
| Nervous system disorder                                             | 6 (0.9)                          |
| Cerebral infarction                                                 | 2 (0.3)                          |
| Dementia                                                            | 1 (0.2)                          |
| Guillain-Barre syndrome                                             | 1 (0.2)                          |
| Subarachnoid hemorrhage                                             | 1 (0.2)                          |
| 6th nerve paralysis                                                 | 1 (0.2)                          |
| Cardiac disorders                                                   | 3 (0.5)                          |
| Acute myocardial infarction                                         | 1 (0.2)                          |
| Myocardial infarction                                               | 1 (0.2)                          |
| Coronary artery dissection                                          | 1 (0.2)                          |
| Vascular disorders                                                  | 1 (0.2)                          |
| Aortic aneurysm rupture                                             | 1 (0.2)                          |
| Respiratory, thoracic and mediastinal disorders                     | 47 (7.4)                         |
| Asthma                                                              | 44 (7.0)                         |

|                                                      |         |
|------------------------------------------------------|---------|
| Alveolar proteinosis                                 | 1 (0.2) |
| Atelectasis                                          | 1 (0.2) |
| Interstitial lung disease                            | 1 (0.2) |
| Upper respiratory tract inflammation                 | 1 (0.2) |
| Bronchial secretion retention                        | 1 (0.2) |
| Gastrointestinal disorders                           | 3 (0.5) |
| Gastrointestinal perforation                         | 1 (0.2) |
| Intestinal obstruction                               | 1 (0.2) |
| Large intestine perforation                          | 1 (0.2) |
| Hepatobiliary disorders                              | 1 (0.2) |
| Hepatic function abnormal                            | 1 (0.2) |
| Skin and subcutaneous tissue disorders               | 1 (0.2) |
| Angioedema                                           | 1 (0.2) |
| Musculoskeletal and connective tissue disorders      | 2 (0.3) |
| Muscular weakness                                    | 1 (0.2) |
| Immobilization syndrome                              | 1 (0.2) |
| Renal and urinary disorders                          | 1 (0.2) |
| Chronic kidney disease                               | 1 (0.2) |
| General disorders and administration site conditions | 2 (0.3) |
| Death                                                | 1 (0.2) |
| Malaise                                              | 1 (0.2) |
| Injury, poisoning and procedural complications       | 3 (0.5) |
| Fall                                                 | 1 (0.2) |
| Multiple fractures                                   | 1 (0.2) |
| Road traffic accident                                | 1 (0.2) |
| Face injury                                          | 1 (0.2) |
| Infusion-related reaction                            | 1 (0.2) |

---

MedDRA/J version 25.1.

<sup>a</sup> An adverse event was defined as any undesirable or unintended signs, symptoms, and disease regardless of the causality with the administration of benralizumab.

<sup>b</sup> Rectosigmoid cancer and liver metastasis occurred in the same patient.

**Abbreviations:** PT, preferred term; SOC, system organ class.

**Supplementary Table 3.** Status of onset of adverse drug reactions by patient background factors

|                          |                        | <b>Safety population<br/>(n=632)</b> | <b>Patients with adverse drug reactions<sup>a</sup><br/>(n = 80)</b> | <b>Number of onsets of adverse drug reactions</b> | <b>Fisher's exact test p value</b> |
|--------------------------|------------------------|--------------------------------------|----------------------------------------------------------------------|---------------------------------------------------|------------------------------------|
| Sex                      | Male                   | 243 (38.4)                           | 32 (13.2)                                                            | 53                                                | 0.8060                             |
|                          | Female                 | 389 (61.6)                           | 48 (12.3)                                                            | 78                                                |                                    |
| Age (years)              | <20                    | 2 (0.3)                              | 1 (50.0)                                                             | 3                                                 | 0.1973                             |
|                          | 20 to <30              | 11 (1.7)                             | 1 (9.1)                                                              | 1                                                 |                                    |
|                          | 30 to <40              | 42 (6.6)                             | 5 (11.9)                                                             | 7                                                 |                                    |
|                          | 40 to <50              | 74 (11.7)                            | 11 (14.9)                                                            | 22                                                |                                    |
|                          | 50 to <60              | 96 (15.2)                            | 17 (17.7)                                                            | 28                                                |                                    |
|                          | 60 to <70              | 117 (18.5)                           | 14 (12.0)                                                            | 20                                                |                                    |
|                          | 70 to <80              | 200 (31.6)                           | 17 (8.5)                                                             | 25                                                |                                    |
|                          | ≥80                    | 90 (14.2)                            | 14 (15.6)                                                            | 25                                                |                                    |
| Age (years)              | <70                    | 342 (54.1)                           | 49 (14.3)                                                            | 81                                                | 0.1876                             |
|                          | ≥70                    | 290 (45.9)                           | 31 (10.7)                                                            | 50                                                |                                    |
| Pre-treatment severity   | Mild intermittent      | 7 (1.1)                              | 1 (14.3)                                                             | 2                                                 | 0.9977                             |
|                          | Mild persistent        | 9 (1.4)                              | 1 (11.1)                                                             | 3                                                 |                                    |
|                          | Moderate persistent    | 83 (13.1)                            | 10 (12.0)                                                            | 15                                                |                                    |
|                          | Severe persistent      | 344 (54.4)                           | 45 (13.1)                                                            | 74                                                |                                    |
|                          | Most severe persistent | 185 (29.3)                           | 23 (12.4)                                                            | 37                                                |                                    |
|                          | Unknown                | 4 (0.6)                              | 0                                                                    | 0                                                 |                                    |
| Disease duration (years) | <10                    | 123 (19.5)                           | 7 (5.7)                                                              | 9                                                 | 0.0257                             |
|                          | 10 to <20              | 109 (17.2)                           | 14 (12.8)                                                            | 22                                                |                                    |
|                          | 20 to <30              | 57 (9.0)                             | 7 (12.3)                                                             | 10                                                |                                    |
|                          | ≥30                    | 77 (12.2)                            | 15 (19.5)                                                            | 37                                                |                                    |
|                          | Unknown                | 266 (42.1)                           | 37 (13.9)                                                            | 53                                                |                                    |
| BMI (kg/m <sup>2</sup> ) | <25.0                  | 365 (57.8)                           | 52 (14.2)                                                            | 88                                                | 0.3663                             |
|                          | ≥25.0                  | 204 (32.3)                           | 23 (11.3)                                                            | 36                                                |                                    |
|                          | Not calculated         | 63 (10.0)                            | 5 (7.9)                                                              | 7                                                 |                                    |

|                                            |                                     |            |           |     |        |
|--------------------------------------------|-------------------------------------|------------|-----------|-----|--------|
| Smoking habit                              | Current                             | 29 (4.6)   | 4 (13.8)  | 5   | 0.8465 |
|                                            | Past                                | 197 (31.2) | 27 (13.7) | 42  |        |
|                                            | Never                               | 372 (58.9) | 46 (12.4) | 79  |        |
|                                            | Unknown                             | 34 (5.4)   | 3 (8.8)   | 5   |        |
| Atopic predisposition                      | Yes                                 | 275 (43.5) | 41 (14.9) | 64  | 0.2094 |
|                                            | No                                  | 290 (45.9) | 32 (11.0) | 57  |        |
|                                            | Unknown                             | 67 (10.6)  | 7 (10.4)  | 10  |        |
| History of AERD                            | Yes                                 | 49 (7.8)   | 14 (28.6) | 26  | 0.0011 |
|                                            | No                                  | 525 (83.1) | 57 (10.9) | 91  |        |
|                                            | Unknown                             | 58 (9.2)   | 9 (15.5)  | 14  |        |
| Outpatient/inpatient                       | Outpatient                          | 590 (93.4) | 69 (11.7) | 115 | 0.0109 |
|                                            | Inpatient                           | 40 (6.3)   | 11 (27.5) | 16  |        |
|                                            | Unknown                             | 2 (0.3)    | 0         | 0   |        |
| Previous treatment for asthma <sup>b</sup> | Anti-IL5 antibody                   | 114 (18.2) | 16 (14.0) | 28  | -      |
|                                            | Anti-IgE antibody                   | 48 (7.7)   | 7 (14.6)  | 15  |        |
|                                            | Anti-IL4 receptor $\alpha$ antibody | 5 (0.8)    | 2 (40.0)  | 2   |        |
| Comorbidities <sup>b</sup>                 | Yes                                 | 502 (79.4) | 68 (13.5) | 118 | 0.1763 |
|                                            | Rhinitis allergic                   | 220 (43.8) | 34 (15.5) | 56  |        |
|                                            | Chronic sinusitis                   | 172 (34.3) | 31 (18.0) | 61  |        |
|                                            | COPD                                | 115 (22.9) | 16 (13.9) | 21  |        |
|                                            | Eosinophilic otitis media           | 62 (12.4)  | 14 (22.6) | 22  |        |
|                                            | Nasal polyps                        | 61 (12.2)  | 9 (14.8)  | 13  |        |
|                                            | Reflux esophagitis                  | 52 (10.4)  | 7 (13.5)  | 10  |        |
|                                            | Eosinophilic rhinosinusitis         | 16 (3.2)   | 3 (18.8)  | 4   |        |
|                                            | Renal disease                       | 12 (2.4)   | 3 (25.0)  | 5   |        |
|                                            | ABPA                                | 10 (2.0)   | 1 (10.0)  | 1   |        |
|                                            | Malignant tumor                     | 9 (1.8)    | 0         | 0   |        |
|                                            | EGPA                                | 7 (1.4)    | 0         | 0   |        |
|                                            | Atopic dermatitis                   | 2 (0.4)    | 0         | 0   |        |
|                                            | Hepatic disease                     | 4 (0.8)    | 0         | 0   |        |
|                                            | Hepatitis viral                     | 4 (0.8)    | 2 (50.0)  | 6   |        |

|                                                                                              |              |            |           |    |        |
|----------------------------------------------------------------------------------------------|--------------|------------|-----------|----|--------|
|                                                                                              | Others       | 298 (59.4) | 45 (15.1) | 86 |        |
|                                                                                              | No           | 125 (19.8) | 11 (8.8)  | 12 |        |
|                                                                                              | Unknown      | 5 (0.8)    | 1 (20.0)  | 1  | -      |
| Exacerbations that required systemic corticosteroid in the past 12 months <sup>c</sup>       | Yes          | 442 (69.9) | 59 (13.3) | 96 | 0.3192 |
|                                                                                              | No           | 151 (23.9) | 15 (9.9)  | 22 |        |
|                                                                                              | Unknown      | 39 (6.2)   | 6 (15.4)  | 13 | -      |
| Number of treatments with systemic steroid or dose increases of oral steroid <sup>c, d</sup> | <3 times     | 300 (47.5) | 34 (11.3) | 54 | 0.2195 |
|                                                                                              | ≥3 times     | 197 (31.2) | 30 (15.2) | 50 |        |
|                                                                                              | Unknown      | 95 (15.0)  | 10 (10.5) | 14 | -      |
|                                                                                              | Not reported | 1 (0.2)    | 0         | 0  |        |
| Exacerbations resulting in emergency department visit in the past 12 months <sup>e</sup>     | Yes          | 326 (51.6) | 39 (12.0) | 53 | 0.8025 |
|                                                                                              | No           | 267 (42.2) | 34 (12.7) | 63 |        |
|                                                                                              | Unknown      | 39 (6.2)   | 7 (17.9)  | 15 | -      |
| Exacerbations resulting in hospital admission in the past 12 months                          | Yes          | 173 (27.4) | 24 (13.9) | 31 | 0.4928 |
|                                                                                              | No           | 430 (68.0) | 50 (11.6) | 85 |        |
|                                                                                              | Unknown      | 29 (4.6)   | 6 (20.7)  | 15 | -      |
| Eosinophil count (/μL)                                                                       | <150         | 159 (25.2) | 16 (10.1) | 24 | 0.5576 |
|                                                                                              | 150 to <300  | 60 (9.5)   | 8 (13.3)  | 16 |        |
|                                                                                              | ≥300         | 266 (42.1) | 36 (13.5) | 64 |        |
|                                                                                              | Unknown      | 147 (23.3) | 20 (13.6) | 27 | -      |
| FeNO (ppb)                                                                                   | <37          | 135 (21.4) | 16 (11.9) | 23 | 0.5999 |
|                                                                                              | ≥37          | 148 (23.4) | 21 (14.2) | 41 |        |
|                                                                                              | Unknown      | 349 (55.2) | 43 (12.3) | 67 | -      |
| Serum total IgE level (IU/mL)                                                                | <150         | 121 (19.1) | 10 (8.3)  | 19 | 0.0227 |
|                                                                                              | ≥150         | 215 (34.0) | 37 (17.2) | 63 |        |



|                                                          |                                                               |            |           |    |        |
|----------------------------------------------------------|---------------------------------------------------------------|------------|-----------|----|--------|
|                                                          | Unknown                                                       | 296 (46.8) | 33 (11.1) | 49 | -      |
| Biomarker subtype: Eosinophils<br>×FeNO                  | Eosinophil count <300/μL and FeNO <37 ppb                     | 80 (12.7)  | 9 (11.3)  | 13 | 0.5901 |
|                                                          | Eosinophil count <300/μL and FeNO ≥37 ppb                     | 37 (5.9)   | 3 (8.1)   | 11 |        |
|                                                          | Eosinophil count ≥300/μL and FeNO <37 ppb                     | 50 (7.9)   | 6 (12.0)  | 9  |        |
|                                                          | Eosinophil count ≥300/μL and FeNO ≥37 ppb                     | 103 (16.3) | 17 (16.5) | 27 |        |
|                                                          | Unknown                                                       | 362 (57.3) | 45 (12.4) | 71 | -      |
| Biomarker subtype: Eosinophils<br>×serum total IgE level | Eosinophil count <300/μL and serum total IgE level <150 IU/mL | 66 (10.4)  | 5 (7.6)   | 8  | 0.1506 |
|                                                          | Eosinophil count <300/μL and serum total IgE level ≥150 IU/mL | 73 (11.6)  | 14 (19.2) | 27 |        |
|                                                          | Eosinophil count ≥300/μL and serum total IgE level <150 IU/mL | 54 (8.5)   | 5 (9.3)   | 11 |        |
|                                                          | Eosinophil count ≥300/μL and serum total IgE level ≥150 IU/mL | 139 (22.0) | 22 (15.8) | 33 |        |
|                                                          | Unknown                                                       | 300 (47.5) | 34 (11.3) | 52 | -      |
| FEV <sub>1</sub> (L)                                     | <1.7                                                          | 220 (34.8) | 24 (10.9) | 41 | 0.4253 |
|                                                          | ≥1.7                                                          | 157 (24.8) | 22 (14.0) | 37 |        |
|                                                          | Unknown                                                       | 255 (40.3) | 34 (13.3) | 53 | -      |

Data are n (%).

<sup>a</sup> Defined as any adverse event causally related to benralizumab or for which a causal relationship with benralizumab was unknown due to insufficient or contradictory information.

<sup>b</sup> Details may overlap.

<sup>c</sup> Administration of systemic steroid (other than control drugs) for ≥3 days or increase of the maintenance dose of oral steroid for ≥3 days (a single administration of a systemic steroid depot preparation is considered equivalent to a 3-day administration) due to worsening of asthma within 1 year before the start of benralizumab.

<sup>d</sup> Patients reported as having no events were counted as having zero events.

<sup>e</sup> Emergency room or emergency outpatient visit requiring administration of systemic corticosteroids due to exacerbation of asthma up to 1 year before the start of treatment with benralizumab.

**Abbreviations:** ABPA, allergic bronchopulmonary aspergillosis; AERD, aspirin-exacerbated respiratory disease; BMI, body mass index; COPD, chronic obstructive pulmonary disease; EGPA, eosinophilic granulomatosis with polyangiitis; FeNO, fractional exhaled nitric oxide; FEV<sub>1</sub>, forced expiratory volume in 1 second; IgE, immunoglobulin E; IL, interleukin.

**Supplementary Table 4.** Change from baseline in biomarkers

|                                    |                      | Baseline       | At 4 weeks     | At 8 weeks      | At 16 weeks     | At 1 year       | Last observation |                 |
|------------------------------------|----------------------|----------------|----------------|-----------------|-----------------|-----------------|------------------|-----------------|
| Eosinophil count ( $\mu\text{L}$ ) | n                    | 217            | 147            | 152             | 142             | 95              | 217              |                 |
|                                    | Mean (SD)            | 642 (721)      | 5 (18)         | 6 (23)          | 13 (75)         | 23 (82)         | 13 (61)          |                 |
|                                    | Min, Max             | 0, 5305        | 0, 149         | 0, 185          | 0, 851          | 0, 590          | 0, 590           |                 |
|                                    | Median               | 422            | 0              | 0               | 0               | 0               | 0                |                 |
|                                    | Change from baseline | Mean (SD)      | –              | –682 (695)      | –649 (774)      | –633 (740)      | –634 (687)       | –629 (715)      |
|                                    |                      | Min, Max       | –              | –3948, 73       | –5301, 155      | –5305, 201      | –3226, 151       | –5305, 151      |
|                                    |                      | Median         | –              | –493            | –431            | –447            | –402             | –410            |
| 95% CI                             |                      | –              | –796, –569     | –773, –525      | –755, –510      | –774, –494      | –725, –533       |                 |
| FeNO (ppb)                         | n                    | 130            | 76             | 75              | 83              | 37              | 130              |                 |
|                                    | Mean (SD)            | 65.6 (61.8)    | 71.4 (67.7)    | 62.5 (53.8)     | 59.6 (55.3)     | 35.3 (32.8)     | 52.5 (52.7)      |                 |
|                                    | Min, Max             | 0, 278         | 5, 285         | 5, 227          | 6, 288          | 7, 164          | 5, 288           |                 |
|                                    | Median               | 40.0           | 45.5           | 44.0            | 44.0            | 24.0            | 37.0             |                 |
|                                    | Change from baseline | Mean (SD)      | –              | 9.4 (47.5)      | –2.8 (46.8)     | –4.2 (42.7)     | –26.7 (49.4)     | –13.1 (50.8)    |
|                                    |                      | Min, Max       | –              | –142, 163       | –161, 126       | –136, 98        | –153, 129        | –200, 129       |
|                                    |                      | Median         | –              | 4.0             | 1.0             | 0.0             | –13.0            | –5.5            |
| 95% CI                             |                      | –              | –1.5, 20.3     | –13.6, 8.0      | –13.5, 5.1      | –43.1, –10.2    | –22.0, –4.3      |                 |
| Serum total IgE level (IU/mL)      | n                    | 122            | 63             | 71              | 75              | 49              | 122              |                 |
|                                    | Mean (SD)            | 821.6 (1685.1) | 889.7 (1989.9) | 941.8 (2147.3)  | 830.6 (1638.6)  | 783.2 (1069.2)  | 836.0 (1822.2)   |                 |
|                                    | Min, Max             | 3.0, 11092.0   | 12.0, 14600.0  | 2.0, 14000.0    | 2.0, 12300.0    | 4.0, 4780.0     | 4.0, 14000.0     |                 |
|                                    | Median               | 344.9          | 418.0          | 391.3           | 382.0           | 422.1           | 306.0            |                 |
|                                    | Change from baseline | Mean (SD)      | –              | –0.3 (993.2)    | –2.9 (869.9)    | –33.3 (981.4)   | –115.5 (1382.2)  | 14.4 (1071.3)   |
|                                    |                      | Min, Max       | –              | –5658.0, 5140.0 | –5634.0, 4000.0 | –6725.0, 3596.0 | –9178.0, 1634.0  | –9178.0, 4000.0 |
|                                    |                      | Median         | –              | –8.0            | –6.0            | –11.0           | 4.7              | –2.5            |
| 95% CI                             |                      | –              | –250.5, 249.8  | –208.8, 203.0   | –259.1, 192.5   | –512.5, 281.6   | –177.6, 206.4    |                 |

Patients in the effectiveness population who had data at baseline and at one or more time points from the start of treatment administration to the last observation.

**Abbreviations:** CI, confidence interval; FeNO, fractional exhaled nitric oxide; IgE, immunoglobulin E; SD, standard deviation.

**Supplementary Table 5.** Response rates of asthma control by Asthma Control Questionnaire-5 (ACQ-5)

score

| <b>ACQ-5 at baseline</b>             |                  | <b>n</b> | <b>Well-controlled<br/>ACQ score<br/>≤0.75</b>                                                            | <b>Partly controlled<br/>ACQ score 0.75–<br/>1.5</b> | <b>Not well-<br/>controlled<br/>ACQ score ≥1.5</b> |
|--------------------------------------|------------------|----------|-----------------------------------------------------------------------------------------------------------|------------------------------------------------------|----------------------------------------------------|
| ACQ <1.5                             | Baseline         | 49       | 21 (42.9)                                                                                                 | 28 (57.1)                                            | 0                                                  |
|                                      | Week 4           | 37       | 23 (62.2)                                                                                                 | 10 (27.0)                                            | 4 (10.8)                                           |
|                                      | Week 8           | 37       | 26 (70.3)                                                                                                 | 10 (27.0)                                            | 1 (2.7)                                            |
|                                      | Week 16          | 31       | 19 (61.3)                                                                                                 | 9 (29.0)                                             | 3 (9.7)                                            |
|                                      | Year 1           | 19       | 13 (68.4)                                                                                                 | 5 (26.3)                                             | 1 (5.3)                                            |
|                                      | Last observation | 49       | 33 (67.3)                                                                                                 | 12 (24.5)                                            | 4 (8.2)                                            |
| ACQ ≥1.5                             | Baseline         | 139      | 0                                                                                                         | 0                                                    | 139 (100.0)                                        |
|                                      | Week 4           | 111      | 17 (15.3)                                                                                                 | 35 (31.5)                                            | 59 (53.2)                                          |
|                                      | Week 8           | 106      | 31 (29.2)                                                                                                 | 28 (26.4)                                            | 47 (44.3)                                          |
|                                      | Week 16          | 98       | 34 (34.7)                                                                                                 | 20 (20.4)                                            | 44 (44.9)                                          |
|                                      | Year 1           | 53       | 19 (35.8)                                                                                                 | 11 (20.8)                                            | 23 (43.4)                                          |
|                                      | Last observation | 139      | 42 (30.2)                                                                                                 | 25 (18.0)                                            | 72 (51.8)                                          |
| <b>ACQ-5 at baseline<sup>a</sup></b> |                  | <b>n</b> | <b>Improved: reduced by ≥0.5 (Week 4/ Week 8/ Week 16/<br/>Year 1/ last observation – baseline score)</b> |                                                      |                                                    |
| ACQ <1.5                             | Week 4           | 26       | 15 (57.7)                                                                                                 |                                                      |                                                    |
|                                      | Week 8           | 23       | 12 (52.2)                                                                                                 |                                                      |                                                    |
|                                      | Week 16          | 20       | 11 (55.0)                                                                                                 |                                                      |                                                    |
|                                      | Year 1           | 13       | 6 (46.2)                                                                                                  |                                                      |                                                    |
|                                      | Last observation | 33       | 16 (48.5)                                                                                                 |                                                      |                                                    |
| ACQ ≥1.5                             | Week 4           | 111      | 74 (66.7)                                                                                                 |                                                      |                                                    |
|                                      | Week 8           | 106      | 84 (79.2)                                                                                                 |                                                      |                                                    |
|                                      | Week 16          | 98       | 73 (74.5)                                                                                                 |                                                      |                                                    |
|                                      | Year 1           | 53       | 44 (83.0)                                                                                                 |                                                      |                                                    |
|                                      | Last observation | 139      | 104 (74.8)                                                                                                |                                                      |                                                    |

Data are n (%).

<sup>a</sup> Patients in the effectiveness population who had data at baseline and at one or more time points from the start of treatment administration to the last observation. Patients with an initial ACQ score <0.5 were excluded.
